# Supplementary material for: Impact of slack resources on healthcare costs in tertiary and secondary hospitals: a panel data study of public hospitals in Beijing from 2015 to 2019
Source: HighWire-hosted journal article supplement (doi:10.1136/bmjopen-2022-068383), 2023-04-01
Supplement: bmjopen-2022-068383supp001_data_supplement.pdf [file bmjopen-2022-068383supp001_data_supplement.pdf]

Supplementary Table 1. Correlation Analysis of Variables

| Variables     | Mean  | SD    | COST      | slack    | lnbed     | lnsta     | lnincome  | lnaging  | lndensi  | lnurban   |
|---------------|-------|-------|-----------|----------|-----------|-----------|-----------|----------|----------|-----------|
| Tertiary hos  |       |       |           |          |           |           |           |          |          |           |
| COST          | 0.947 | 0.163 | 1         |          |           |           |           |          |          |           |
| slack         | 0.162 | 0.124 | 0.0130    | 1        |           |           |           |          |          |           |
| lnbed         | 6.597 | 0.611 | -0.228*** | 0.106    | 1         |           |           |          |          |           |
| lnsta         | 7.320 | 0.629 | -0.264*** | 0.130*   | 0.914***  | 1         |           |          |          |           |
| lnincome      | 10.98 | 0.265 | 0.325***  | -0.029   | 0.354***  | 0.310***  | 1         |          |          |           |
| lnaging       | 2.473 | 0.217 | -0.015    | -0.062   | 0.476***  | 0.449***  | 0.673***  | 1        |          |           |
| lndensi       | 8.437 | 1.497 | 0.286***  | 0.068    | 0.380***  | 0.415***  | 0.816***  | 0.605*** | 1        |           |
| lnurban       | 4.507 | 0.167 | 0.503***  | 0.018    | 0.172**   | 0.161**   | 0.792***  | 0.408*** | 0.805*** | 1         |
| lnexpen       | 1.838 | 0.250 | 0.071     | -0.062   | 0.057     | 0.080     | 0.146*    | -0.010   | 0.174**  | 0.127     |
| Secondary hos |       |       |           |          |           |           |           |          |          |           |
| COST          | 0.890 | 0.185 | 1         |          |           |           |           |          |          |           |
| slack         | 0.103 | 0.117 | 0.392***  | 1        |           |           |           |          |          |           |
| lnbed         | 6.087 | 0.567 | 0.236**   | 0.266**  | 1         |           |           |          |          |           |
| lnsta         | 6.789 | 0.488 | 0.196*    | 0.357*** | 0.912***  | 1         |           |          |          |           |
| lnincome      | 10.94 | 0.273 | 0.399***  | 0.051    | -0.406*** | -0.305*** | 1         |          |          |           |
| lnaging       | 2.473 | 0.175 | 0.214**   | 0.073    | 0.056     | 0.053     | 0.349***  | 1        |          |           |
| lndensi       | 8.011 | 1.747 | 0.568***  | 0.107    | -0.278*** | -0.178*   | 0.868***  | 0.322*** | 1        |           |
| lnurban       | 4.477 | 0.198 | 0.588***  | 0.235**  | -0.275*** | -0.176*   | 0.835***  | 0.168    | 0.886*** | 1         |
| lnexpen       | 1.754 | 0.233 | -0.124    | -0.266** | 0.167     | 0.027     | -0.276*** | 0.271*** | -0.260** | -0.407*** |

Notes: SD, standard deviation; COST, cost consumption index; lnbed: logarithm of the number of beds; lnsta: logarithm of the total number of staff; lnincome: logarithm of disposable income per capita; lnaging: logarithm of the proportion of the elderly population; lndensi: logarithm of resident population density; lnurban: logarithm of the level of urbanization; lnexpen: logarithm of health expenditure as a percentage of general public budget expenditure; \* p<0.1, \*\* p<0.05, \*\*\* p<0.01.
